1 **Article Title:**

2 Numerical simulation for behind armor blunt trauma of human torso under non-penetrating  
3 ballistic impact

4 **Author List:**

5 Fan Tang <sup>a</sup>, Zerong Guo <sup>a</sup>, Mengqi Yuan <sup>a,\*</sup>, Xinming Qian <sup>a</sup>, Zhiming Du <sup>a</sup>

6 **Author Affiliations:**

7 <sup>a</sup> State Key Laboratory of Explosion Science and Technology, Beijing Institute of Technology,  
8 Beijing, 100081, China

9 \* **Corresponding author:** Mengqi Yuan

10 **E-mail:** [myuan@bit.edu.cn](mailto:myuan@bit.edu.cn)

11 **Telephone number:** +86 010-68913822

12 **Mailing address:** Room 303, State Key Laboratory of Explosion Science and Technology,  
13 Beijing Institute of Technology, 5 South Zhongguancun Street, Haidian District, Beijing, China

14 **Zip code:** 100081

1    **Abstract:** A human torso finite element model with high bio-fidelity was developed to study the  
2    behind armor blunt trauma (BABT) of pistol cartridge on human torso with bulletproof composite  
3    structure (BCS) and the effect of buffer layer (expandable polyethylene, EPE) on BABT. The  
4    bulletproof structure was made of multilayered composite of aluminum alloy (AlSi<sub>10</sub>Mg) and  
5    thermoplastic polyurethanes (TPU), and the ANSYS/LS-DYNA software was used to simulate the  
6    blunt ballistic impact process of pistol cartridge on human torso. Results indicated that the BCS  
7    could resist the shooting speed of 515 m/s without being broken. During the process of pistol  
8    cartridge shooting the BCS, the energy of pistol cartridge was transmitted to the human organs  
9    through the BCS, thereby causing human injury. Moreover, the mechanical response parameters  
10   of various organs were determined by the distance between the human organs and the impact point.  
11   The sternal fracture and liver rupture were not produced based on the threshold stress of sternum  
12   and liver injury, no matter whether the buffer layer was added or not. According to the Axelsson  
13   injury model, a slight to moderate injury was created when there was no buffer layer, but the injury  
14   level was trace to slight caused by the buffer layer with thickness of 1.0 mm, and the buffer layer  
15   with thickness of 2.5 mm and 5.0 mm caused subtle BABT. It was concluded that the buffer layer  
16   could effectively reduce the BABT, and the reduction was related to the thickness of the buffer  
17   layer. This study reveals the mechanism of the BABT, which can provide a theoretical basis for  
18   the design of the bulletproof structure and the evaluation of structural bulletproof performance and  
19   protection performance.

20   **Key words:** Blunt ballistic impact; Human torso; Behind armor blunt trauma; Mechanical  
21   response; Numerical simulation

## 1 **1. Introduction**

2       The body armor is a kind of equipment used to protect the bullets or fragments from harming  
3 the human body, which plays an extremely important protective role for reducing the casualties of  
4 soldiers and police [1-3]. Although the body armor can effectively reduce the penetrating injury  
5 caused by the bullets or fragments, the energy of pistol cartridge will be transmitted to the human  
6 through the body armor, causing injury to the thoracic and abdominal organs, even as indirect brain  
7 injury, this non-penetrating injury phenomenon is called BABT [4, 5]. Among American soldiers,  
8 there have been cases of death due to BABT. Although the body armor remains intact after attack,  
9 the broken ribs stabbed into heart leading to death [6].

10       Body armors are categorized by bulletproof materials into soft body armor, rigid body armor  
11 and soft-rigid composite body armor [7]. The soft body armor has the advantages of softness,  
12 lightweight and comfort, but it is greatly deformed under the shooting of pistol cartridge, so the  
13 BABT caused by soft body armor is serious [8, 9]. The rigid body armor has excellent anti-  
14 penetration performance and non-penetration injury performance, but its disadvantages are rigid,  
15 bulky and uncomfortable [10, 11]. Compared with the bulletproof structure of a single material,  
16 the soft-rigid BCS combines the advantages of soft bulletproof structure and rigid bulletproof  
17 structure, and has better anti-penetration performance and non-penetration injury performance [12-  
18 14]. According to GA 141-2010 “Police ballistic resistance of body armor” [15], the backing  
19 materials (such as clay) are used to simulate the human torso to assess the bulletproof performance  
20 of body armor. In the case of a valid hit for bullet, the body armor can block the warhead, and the

1 maximum backface signature is less than or equal to 25 mm, that is, the body armor can effectively  
2 protect the killing effect of the pistol cartridge, while the NIJ (National Institute of Justice) standard  
3 is 44 mm [16]. It is impossible to ascertain the injury situation of the human wearing the body  
4 armor, so the evaluation method is only suitable for evaluating the bulletproof performance of  
5 body armor, and it is also difficult to be applied to the evaluation of the protective performance of  
6 body armor to the human.

7 Many scholars have also done a lot of research on BABT, but mainly focused on the research  
8 of animal experiments and soft bulletproof materials such as fibers, and the human model used in  
9 previous numerical simulation is not realistic. In 1969, Shepard [17] reported the first case of  
10 BABT of lung, which started the study of BABT. Roberts [18-20] has established a human torso  
11 finite element model with high fidelity, and assessed the BABT caused by NIJ (National Institute  
12 of Justice) soft body armor by testing the mechanical response parameters of the organ near the  
13 ballistic impact point. Kunz et al. [21] studied the heart injury caused by BABT, and analyzed the  
14 formation and propagation of pressure waves in the heart. Sonden et al. [22] studied the blunt  
15 trauma of landrace pigs protected by a ceramic/aramid body armor, and proposed that trauma  
16 attenuating backing can reduce the BABT. Zhang et al. [23] found that high velocity BABT  
17 generates high pressure and acceleration in the animal's spine, and pressure wave is an important  
18 factor in causing BABT. The numerical simulation results of Wickwire et al. [24] showed that both  
19 sternum displacement and pressure are sensitive to impact energy and location of projectile.

20 The BCS made of AlSi<sub>10</sub>Mg and TPU was taken as the research object, and a real human  
21 torso model was developed. The ANSYS/LS-DYNA finite element analysis software was used to

1 simulate the mechanical response of human organs under the blunt ballistic impact of pistol  
2 cartridge.

## 3 **2. Finite element model**

### 4 *2.1. Human torso model*

5 Human torso model consisted of skin (epidermis, dermis and hypodermis), skeleton (sternum,  
6 rib, costal cartilage, vertebral column, intervertebral disc, clavicle and scapula), internal organs  
7 (kidney, pancreas, liver, heart, lung, spleen and stomach), blood, diaphragm and muscle, the half  
8 section view of human torso model as shown in Fig. 1(a). The skeleton, internal organs, blood,  
9 diaphragm and muscle model were modeled as tetrahedral elements and the Lagrange approach  
10 was used. The epidermis, dermis and hypodermis were divided into Belytschko-Tsay shell  
11 elements with thicknesses of 0.1 mm, 2.0 mm and 2.0 mm, respectively. The contact between  
12 human organs was set to automatic single surface contact other than the skin, and the contact  
13 between skin and muscle was defined as tied contact. The material models and material parameters  
14 of human organs [18, 19, 25] were given in Table 1.

### 15 *2.2. Pistol cartridge and BCS model*

16 The BCS was made of “rigid-soft-rigid” composite of  $\text{AlSi}_{10}\text{Mg}$  and TPU with a total  
17 thickness of 12 mm. The composite method of bulletproof structure was shown in Fig. 1(b). Both  
18  $\text{AlSi}_{10}\text{Mg}$  and TPU were divided into 5 layers, except that the thickness of the front face was 3  
19 mm, the thickness of the remaining layers was 1 mm, the protective area was  $0.11 \text{ m}^2$ , and the areal

1 density was 2.37 g/cm<sup>2</sup>. Type 51 pistol cartridge was used to shoot BCS, the mass of warhead was  
2 5.6 g, the initial velocity was 515 ± 10 m/s, the structure of warhead was round, and the material  
3 was steel jacket and lead core, which geometry was shown in Fig.1(c). The expandable  
4 polyethylene (EPE) buffer layer was added between human torso and BCS to weaken the blunt  
5 impact of BCS on human torso, and the effect of the thickness of the buffer layer on BAPT was  
6 studied. The material models and material parameters of pistol cartridge [26], AlSi<sub>10</sub>Mg [27], TPU  
7 [28] and EPE [29] were given in Table 2~5, respectively.

8 The finite element model (FEM) was built in g-cm-μs unit. The pistol cartridge, BCS and  
9 buffer layer were divided into hexahedral elements, as well as Lagrange approach was adopted.  
10 The contact between steel jacket and lead core, pistol cartridge and BCS, pistol cartridge and buffer  
11 layer, pistol cartridge and human torso were defined as erosion surface-to-surface contact.  
12 Moreover, the contact between AlSi<sub>10</sub>Mg layer and human torso, TPU layer and human torso,  
13 buffer layer and human torso were set to automatic single surface contact, and the contact between  
14 AlSi<sub>10</sub>Mg layer, TPU layer and buffer layer were defined as tied contact. To prevent the influence  
15 of stress waves generated by the impact of pistol cartridge on the calculation results, non-reflective  
16 boundary conditions were imposed at the boundary of BCS and buffer layer [30]. The calculation  
17 model was shown in Fig. 1(d).

### 18 2.3. Validation of FEM

19 In the Roberts's research [18], the 9 mm Full Metal Jacket (FMJ) Luger ammo with an initial  
20 velocity of 430 m/s was used to shoot Kevlar soft body armor with the thickness for National

1 Institute of Justice (NIJ) Level IIIa vests of 10.82 mm. The diameter of the warhead was 9.03 mm,  
2 the weight was 8 g, the structure was oval, and the material was lead core and full metal jacket.  
3 The structure of 9 mm FMJ Luger ammo was shown in Fig. 3. The pistol cartridge and body armor  
4 models used by Roberts and the human torso model established in this paper were used for the  
5 validation of FEM, the material parameters of pistol cartridge and body armor were shown in the  
6 reference [10, 31].

7 Fig. 4 shows the simulated and Roberts's pressure curve at the middle of the front of heart.  
8 The peak pressure of heart obtained by numerical simulation is 0.958 MPa, while the peak pressure  
9 of heart given by Roberts is 0.743 MPa, which the relative error is 28.9%. It is concluded that the  
10 numerical simulation result is in good agreement with Roberts' research, so the finite element  
11 model established in this paper is reasonable. However, the trend of the pressure curve still differs,  
12 which is caused by the difference between the human torso model, body armor and measurement  
13 points.

### 14 **3. Results and discussion**

15 The pistol cartridge shot the human torso at an initial velocity of 515 m/s (initial kinetic  
16 energy was 742.63 J) from the middle of sternum in front of heart. The bulletproof performance  
17 of BCS, the mechanical response of human organs, and the effect of buffer layer on BABT were  
18 obtained by numerical simulation.

#### 19 *3.1. Bulletproof performance of BCS*

20 Fig. 5 shows the impact process of pistol cartridge on BCS, Fig. 6 reveals the changes of the

1 velocity of pistol cartridge, total energy of BCS and human torso. The positive velocity of pistol  
2 cartridge drops to zero at 68  $\mu$ s, followed by inverse motion, with a maximum inverse velocity of  
3 60.74 m/s. The reason for the inverse motion of pistol cartridge is that TPU is an elastomer rubber,  
4 as well as skin and muscle have some elasticity. After the positive velocity of pistol cartridge  
5 decays to zero, the energy of BCS and human torso will be transferred to the pistol cartridge due  
6 to the rebound of pistol cartridge, TPU, skin and muscle, so the pistol cartridge begins to move in  
7 inverse after gaining kinetic energy. The maximum total energy absorbed by BCS is 208.00 J,  
8 accounting for 28% of the initial kinetic energy of pistol cartridge, while the maximum total energy  
9 delivered to the human torso is 37.02 J, which accounts for 5% of the initial kinetic energy of pistol  
10 cartridge. It is obvious that the BCS absorbs more energy than human torso. On one hand, the BCS  
11 is directly shot by pistol cartridge, so it bears most of the energy of pistol cartridge. On the other  
12 hand, the pistol cartridge does not directly shoot the human torso, and the last layer of BCS is TPU,  
13 which acts as a buffer, thereby reducing the blunt ballistic impact of BCS on human torso.  
14 Consequently, the BCS absorbs more energy and transmits less energy to human torso.

15 It is observed from Fig. 5 that when the BCS is subjected to the impact of pistol cartridge, it  
16 will be deformed, sunken or even broken. The deformation of the AlSi<sub>10</sub>Mg layer is mainly  
17 fragmentation, while the TPU layer mainly suffered from compression deformation. The protective  
18 mechanism of BCS mainly relies on the deformation or fragmentation of BCS to absorb part of  
19 the kinetic energy of pistol cartridge and converts it into its own internal energy and kinetic energy,  
20 and transmits part of the energy of pistol cartridge to human torso at the same time.

21 The numerical simulation results indicate that the BCS is not broken down by pistol cartridge,



1 and the maximum depression depth of skin is 4.98 mm, which is less than 25 mm specified by the  
2 Chinese standard [32] and 44 mm specified by the NIJ standard [16]. Hence, the pistol cartridge  
3 does not directly shoot the human torso. Meanwhile, it can be found that the depression depth of  
4 skin behind the BCS is small, the reason is that the human torso has a certain supporting effect on  
5 BCS, especially for skeleton, its stiffness and damping are relatively large [33].

### 6 *3.2. Blunt ballistic impact process of pistol cartridge on human torso*

7 The BCS is not penetrated by pistol cartridge, so the pistol cartridge dose not directly hit the  
8 human torso. However, when the pistol cartridge interacts with BCS, 5% of the initial kinetic  
9 energy (37.02 J) of pistol cartridge is transmitted to the human organs through BCS and spreads  
10 around the impact point, thereby causing human organs injury.

11 Fig. 7~11 displays the distribution of stress and pressure of skin, heart, lung, liver and  
12 skeleton under the blunt ballistic impact of pistol cartridge. The stress first appears in front of skin,  
13 skeleton, lungs, heart and liver, and the time of appearance is 12  $\mu\text{s}$ , 14  $\mu\text{s}$ , 20  $\mu\text{s}$ , 34  $\mu\text{s}$ , 40  $\mu\text{s}$ ,  
14 respectively. It is found that the mechanical response time of various organs has certain differences  
15 under the influence of the distance between the human organs and impact point. The stress wave  
16 and pressure wave of lungs are generated at 20  $\mu\text{s}$ , and gradually spread to the whole lung at 200  
17  $\mu\text{s}$ , 1000  $\mu\text{s}$ , 2000  $\mu\text{s}$ , which reflects the propagation of stress waves and pressure waves from  
18 surface to inside and from near to far. Under the blunt ballistic impact of pistol cartridge, the skin  
19 at the impact point is the first to appear stress and the peak stress is the largest, then the stress  
20 spreads around the impact point and gradually spreads through the muscles to the skeleton and

1 internal organs, such as sternum, lungs, heart and liver. As the stress wave propagates in the human  
2 organs, its energy will be attenuated, resulting in the most serious injury to the human organs near  
3 the impact point, while the human organs injury far from the impact point is the lightest. For  
4 example, the maximum stress in front of lungs is 12.79 kPa, and the maximum stress in the back  
5 of lungs is 1.95 kPa.

6 For the same organ, the propagation laws of stress waves and pressure waves have extremely  
7 significant differences. At 20  $\mu\text{s}$ , 200  $\mu\text{s}$ , 1000  $\mu\text{s}$ , and 2000  $\mu\text{s}$ , lung stress is mainly concentrated  
8 in front of lungs, and pressure has spread throughout the lungs at these times, as shown in Fig. 9.  
9 At 200  $\mu\text{s}$ , the lung stress is positive, and the maximum stress and minimum stress are different by  
10 six orders of magnitude, while the pressure has both positive and negative values, which differ by  
11 two orders of magnitude. During the blunt ballistic impact of pistol cartridge on human torso, part  
12 of the energy of pistol cartridge is transmitted to the human organs in the form of pressure waves.  
13 A high-pressure shock wave is formed in front of pistol cartridge, its speed is close to the speed of  
14 sound in the human organs, and the peak can reach tens of atmospheric pressure [34, 35].  
15 Consequently, the pressure wave propagates faster and has a wider range of influence. In contrast,  
16 the stress can only occur when the human organs is deformed by external force, so its propagation  
17 speed is slow and the incidence is small [36].

### 18 *3.3. Mechanical response of human organs*

19 The position that the human organs closest to the impact point is selected as the measuring  
20 point, and the stress, pressure, acceleration and velocity curves of skeleton and internal organs are

1 shown in Fig. 12 and Fig. 13.

2 When there is no buffer layer, the mechanical response parameters of various organs are  
3 shown in Table 6. The maximum stresses of sternum, ribs, costal cartilage, heart, lung and liver  
4 are 72.27 MPa, 25.43 MPa, 0.33 MPa, 14.16 kPa, 12.79 kPa and 6.62 kPa, respectively, and the  
5 maximum pressures are 27.87 MPa, 6.50 MPa, 0.49 MPa, 8.02 MPa, 8.26 MPa and 3.39 MPa,  
6 respectively. It can be found that the skeleton stress is MPa level, but the internal organs stress is  
7 kPa level. In the evolutionary history of human skeleton, the skeletal plays a supporting role in  
8 protecting the internal organs such as the lungs and heart, so the skeletal system bears most of the  
9 energy. Since the sternum is closest to the impact point, followed by costal cartilage and ribs, the  
10 stress and pressure of sternum are greater than that of costal cartilage and ribs. At the same time,  
11 the costal cartilage is softer than sternum and ribs, so its pressure and stress are less than sternum  
12 and ribs. According to the literature [37], the threshold stress of sternal fracture is 75~137 MPa,  
13 and the simulated peak stress of sternum is 72.27 MPa, so the BCS will not create sternal fracture.

14 The stress and pressure of lungs are the largest because the lungs are closest to the skeleton  
15 and impact point. Relative to the lungs, the heart is located between the two lungs and is far from  
16 the impact point. Under the protection of skeletons and lungs, the stress and pressure of heart are  
17 small, so the heart injury is also light. If the heart is exposed to excessive impact energy, it will  
18 also produce blunt rupture, resulting in serious injury or even death. Moreover, the blood pressure  
19 in the heart will be affected by the impact of pistol cartridge and rapidly increase, resulting in  
20 bleeding of the heart. The stress and pressure of liver are the smallest because it is farthest from  
21 the impact point, and the peak stress is 6.62 kPa. According to the literature [38], the threshold

1 stress of liver rupture is 127~192 kPa, so the liver does not rupture.

2 The mechanism of BABT is related to the pressure wave and stress wave generated by the  
3 instantaneous deformation of BCS, and on the other hand, it is created by the energy transmitted  
4 to the human by BCS [39]. The pressure wave can cause impact injury to the human organs near  
5 the impact point. If it is transmitted to the brain through blood, vertebrae and hypodermis, it will  
6 bring about indirect brain injury. However, the stress wave can create laceration of human organs.  
7 Meanwhile, the acceleration caused by the instantaneous deformation of BCS is also a key factor  
8 of human injury. The maximum accelerations of sternum, ribs, costal cartilage, heart, lung and  
9 liver are 4488.23 g, 472.38 g, 15308.48 g, 1857.39 g, 3313.34 g, and 1093.92 g, respectively.  
10 According to Newton's second law of motion, when the mass of organ is constant, the greater the  
11 peak acceleration, the greater the force on organ, and the greater the degree of human injury. Thus,  
12 the costal cartilage in the skeletal system is the most traumatic, and the lung in the internal organs  
13 is the most serious [40]. If the threshold acceleration of human injury is exceeded, the internal  
14 organs will be displaced, resulting in strain and tear on the contact surface of organs.

15 Axelsson [41] believed that human injury induced by blast wave was that the chest wall  
16 produced a certain inward velocity and compressed the lungs to create severe lung injury.  
17 Consequently, the maximum inward chest wall velocity was used as the evaluation index of human  
18 injury, and the blast injury model was proposed. The human injury level was divided into five  
19 sections: no injury (0.0~3.6 m/s), trace to slight (3.6~7.5 m/s), slight to moderate (4.3~9.8 m/s),  
20 moderate to extensive (7.5~16.9 m/s), >50% lethality (>12.8 m/s). The essence of BABT is  
21 precisely because the bulletproof structure will have a certain blunt ballistic impact on human body

1 under the impact of pistol cartridge, resulting the chest wall to move inward and compressing the  
2 thoracic organs to cause injury. Hence, the Axelsson injury model can be used as the main  
3 evaluation index for BABT. The sternum at the impact point is selected as the velocity of chest  
4 wall, and the maximum inward velocity of sternum is 6.42 m/s, so the injury level caused by BCS  
5 is slight to moderate. Meanwhile, the difference in the maximum velocities of ribs, costal cartilage,  
6 heart, lung and liver are 2.38 m/s, 14.56 m/s, 3.68 m/s, 6.44 m/s, 1.96 m/s, respectively, which also  
7 cause injury on the interface of human organs.

8 The peak pressures at the middle of front of heart and liver obtained by Roberts [18] are 0.743  
9 MPa and 0.130 MPa, respectively, while the peak pressures of heart and liver from the nearest  
10 impact point are 8.02 MPa and 3.39 MPa in this paper. It can be seen that the results obtained in  
11 this paper are larger than those obtained by Roberts [18]. The main reasons for the differences are:  
12 (1) the effect of type and initial velocity of pistol cartridge. Roberts's research shows that the peak  
13 pressure of organs increases with the increase of the velocity of pistol cartridge. (2) The effect of  
14 structural features, materials and thickness of body armor. The soft body armor itself can play a  
15 certain buffering effect, thus reducing the peak pressure of organs. (3) The effect of the measuring  
16 point's position. Roberts selects the middle of front of organs for measuring point, but the  
17 measurement point may not be the point closest to the impact point. For example, the point of liver  
18 closest to the impact point is located near the inferior vena cava, and the middle of the front of  
19 liver is about 4 cm from the inferior vena cava, resulting in less pressure of organ. (4) The effect  
20 of the structural characteristics of human model, such as thicker skin and muscle can play a better  
21 buffering role, thereby reducing the injury of internal organs.

### 1 3.4. *Effect of buffer layer on BABT*

2 The main function of buffer layer is to weaken the blunt impact of BCS on human, and reduce  
3 the BABT caused by BCS. In practical applications, low-density foam materials such as EPE are  
4 often used as buffer layers, and its thickness has a reasonable range [42]. The buffer layer is too  
5 thin to protect the human by reducing the effect of BABT. Although increasing the thickness of  
6 buffer layer can effectively reduce the BABT, it will increase the weight of BCS and reduce its  
7 comfort. Consequently, the buffer layer with thicknesses of 1.0 mm, 2.5 mm and 5.0 mm were  
8 selected to study the effect of buffer layer on the mechanical response of human organs. Fig. 14  
9 visually shows the effect of buffer layer thickness on human injury.

10 The mechanical response parameters of various organs under different thicknesses of buffer  
11 layer are shown in Table 7. The sternal stresses corresponding to the EPE buffer layers with  
12 thicknesses of 1.0 mm, 2.5 mm and 5.0 mm are 29.95 MPa, 10.16 MPa and 0.66 MPa, respectively,  
13 the liver stresses are 0.61 kPa, 0.13 kPa and 0.05 kPa, the sternal velocities are 3.94 m/s, 1.23 m/s,  
14 0.04 m/s. According to the threshold stress of sternum and liver injury, sternal fracture and liver  
15 rupture are not caused when the buffer layer is added. According to the Axelsson injury model,  
16 the injury level is trace to slight when the thickness of buffer layer is 1.0 mm, while the buffer  
17 layer with thickness of 2.5 mm and 5.0 mm will create subtle BABT. By comparing the human  
18 injury with or without the buffer layer, it is concluded that the buffer layer can significantly reduce  
19 the BABT, and the reduction is related to the thickness of buffer layer, that is, the thicker the buffer  
20 layer, the lighter the BABT. Therefore, selection of an appropriate buffer layer is very important

1 for reducing the BABT. Although the buffer layer can reduce the BABT to a certain extent, it is  
2 difficult to completely eliminate the BABT [43].

### 3 **4. Conclusion**

4 By simulating the impact process of the pistol cartridge on BCS and the mechanical response  
5 process of the human organs, the mechanism of BABT and the effect of the buffer layer on BABT  
6 were analyzed. The following conclusions are drawn:

7 (1) The BCS can resist the shooting speed of the 515 m/s without being broken down, and the  
8 maximum depression depth of skin at the impact point is 4.98 mm, which is less than 25 mm  
9 specified by the Chinese standard and 44 mm specified by the NIJ standard.

10 (2) The maximum energy absorbed by human torso is 37.02 J, which accounts for 5% of the  
11 initial energy of pistol cartridge. Although the BCS is not broken down, the energy of pistol  
12 cartridge is transmitted to the human torso, thus causing BABT to human organs.

13 (3) The stress waves produced during the impact process begin to propagate from surface to  
14 interior, and from near to far around the impact point. Taking the impact point as the center with  
15 peak stress value, the stress wave decreases continuously during the process of transmission.  
16 Therefore, the closer to the impact point, the more serious the human organ injury.

17 (4) When there is no buffer layer behind the BCS, the peak stresses of sternum and liver are  
18 72.27 MPa and 6.62 kPa, respectively. The BCS will not cause sternal fracture and liver rupture  
19 based on the threshold stress of human organs injury. According to Axelsson injury model, the  
20 maximum inward chest wall velocity is 6.42 m/s, which creates slight to moderate injury.

1 (5) The injury level is trace to slight when the thickness of the buffer layer is 1.0 mm, while  
2 the buffer layer with the thickness of 2.5 mm and 5.0 mm will cause subtle BABT. Therefore, the  
3 use of the buffer layer could effectively reduce the BABT. Meanwhile, the thicker the buffer layer,  
4 the lighter the human injury. Consequently, it is necessary to provide a buffer layer between body  
5 armor and human body for weakening the blunt impact of body armor on human to reduce the  
6 BABT.

## 7 **Acknowledgements**

8 This work was supported by the National Key R&D Program of China (Grant  
9 number 2016YFC0802800 and 2018YFC0809903) and National Natural Science Foundation of  
10 China (Grant number 51874041).

## 11 **References**

- 12 1. Vinson JR, Zukas JA. On the ballistic impact of textile body armor. *Journal of Applied*  
13 *mechanics*. 1975;42(2):263-8.
- 14 2. Schram B, Orr R, Pope R, Hinton B, Norris G. Comparing the effects of different body armor  
15 systems on the occupational performance of police officers. *International journal of*  
16 *environmental research and public health*. 2018;15(5):893.
- 17 3. Liu X, Li M, Li X, Deng X, Zhang X, Yan Y, et al. Ballistic performance of UHMWPE  
18 fabrics/EAMS hybrid panel. *Journal of Materials Science*. 2018;53(10):7357-71.
- 19 4. Vavalle NA, Moreno DP, Rhyne AC, Stitzel JD, Gayzik FS. Lateral impact validation of a  
20 geometrically accurate full body finite element model for blunt injury prediction. *Annals of*



- 1 biomedical engineering. 2013;41(3):497-512.
- 2 5. Cannon L. Behind armour blunt trauma-an emerging problem. Journal of the Royal Army  
3 Medical Corps. 2001;147(1):87-96.
- 4 6. Bir C, Viano D, King A. Development of biomechanical response corridors of the thorax to  
5 blunt ballistic impacts. Journal of biomechanics. 2004;37(1):73-9.
- 6 7. Mamivand M, Liaghat G. A model for ballistic impact on multi-layer fabric targets.  
7 International Journal of Impact Engineering. 2010;37(7):806-12.
- 8 8. Gehring Jr GG. Blunt trauma reduction fabric for body armor. United States of America,  
9 6,627,562, 2003-9-30.
- 10 9. Porwal PK, Phoenix SL. Modeling system effects in ballistic impact into multi-layered  
11 fibrous materials for soft body armor. International journal of fracture. 2005;135(1-4):217-  
12 49.
- 13 10. Babaei B, Shokrieh MM, Daneshjou K. The ballistic resistance of multi-layered targets  
14 impacted by rigid projectiles. Materials Science and Engineering A. 2011;530:208-17.
- 15 11. Hassanin AH, Said MA, Seyam AFM. Composite porous membrane for protecting high -  
16 performance fibers from ultraviolet-visible radiation. Journal of Applied Polymer Science.  
17 2013;128(2):1297-303.
- 18 12. Mohotti D, Ngo T, Mendis P, Raman SN. Polyurea coated composite aluminium plates  
19 subjected to high velocity projectile impact. Materials and Design. 2013;52:1-16.
- 20 13. Jacobs M, Van Dingenen J. Ballistic protection mechanisms in personal armour. Journal of  
21 Materials Science. 2001;36(13):3137-42.

- 1 14. Bhatnagar A. Lightweight ballistic composites: military and law-enforcement applications.  
2 Woodhead Publishing; 2016.
- 3 15. GA 141-2010, Police ballistic resistance of body armor. Beijing: Standards Press of China,  
4 2010.
- 5 16. Hanlon E, Gillich P. Origin of the 44-mm behind-armor blunt trauma standard. *Military*  
6 *medicine*. 2012;177(3):333-9.
- 7 17. Shepard GH, Ferguson JL, Foster JH. Pulmonary contusion. *The Annals of thoracic surgery*.  
8 1969;7(2):110-9.
- 9 18. Roberts JC, Merkle AC, Biermann PJ, Ward EE, Carkhuff BG, Cain RP, et al. Computational  
10 and experimental models of the human torso for non-penetrating ballistic impact. *Journal of*  
11 *biomechanics*. 2007;40(1):125-36.
- 12 19. Roberts JC, O'connor JV, Ward EE. Modeling the effect of nonpenetrating ballistic impact  
13 as a means of detecting behind-armor blunt trauma. *Journal of Trauma and Acute Care*  
14 *Surgery*. 2005;58(6):1241-51.
- 15 20. Roberts JC, Ward EE, Merkle AC, O'Connor JV. Assessing behind armor blunt trauma in  
16 accordance with the National Institute of Justice Standard for Personal Body Armor  
17 Protection using finite element modeling. *Journal of Trauma and Acute Care Surgery*.  
18 2007;62(5):1127-33.
- 19 21. Kunz SN, Arborelius UP, Gryth D, Sonden A, Gustavsson J, Wangyal T, et al. Cardiac  
20 Changes After Simulated Behind Armor Blunt Trauma or Impact of Nonlethal Kinetic  
21 Projectile Ammunition. *Journal of Trauma and Acute Care Surgery*. 2011;71(5):1134-43.

- 1 22. Sondén A, Rocksén D, Riddez L, Davidsson J, Persson JK, Gryth D, et al. Trauma attenuating  
2 backing improves protection against behind armor blunt trauma. *Journal of Trauma and Acute*  
3 *Care Surgery*. 2009;67(6):1191-9.
- 4 23. Zhang B, Huang Y, Su Z, Wang S, Wang S, Wang J, et al. Neurological, functional, and  
5 biomechanical characteristics after high-velocity behind armor blunt trauma of the spine.  
6 *Journal of Trauma and Acute Care Surgery*. 2011;71(6):1680-8.
- 7 24. Wickwire A, Merkle A, Carneal C, Pauson J. Thoracic response to high-rate blunt impacts  
8 using an advanced testing platform. *Biomedical sciences instrumentation*. 2012;48:485-92.
- 9 25. Caruso KS, Hijuelos JC, Peck GE, Biermann PJ, Roberts JC. Development of synthetic  
10 cortical bone for ballistic and blast testing. *Journal of advanced materials*. 2006;38(3):27-36.
- 11 26. Fang Q, Zhang J. 3D numerical modeling of projectile penetration into rock-rubble overlays  
12 accounting for random distribution of rock-rubble. *International Journal of Impact*  
13 *Engineering*. 2014;63:118-28.
- 14 27. Wu J, Wang L, An X. Numerical analysis of residual stress evolution of AlSi10Mg  
15 manufactured by selective laser melting. *Optik*. 2017;137:65-78.
- 16 28. Antoine G, Batra R. Constitutive relations and parameter estimation for finite deformations  
17 of viscoelastic adhesives. *Journal of Applied Mechanics*. 2015;82(2):021001.
- 18 29. Liu J. Study on buffer performance of expanded polyethylene. Hangzhou: Zhejiang  
19 University; 2010.
- 20 30. Hallquist JO. LS-DYNA keyword user's manual. Livermore Software Technology  
21 Corporation. 2007;970:299-800.

- 1 31. Holmquist TJ, Johnson GR. Modeling prestressed ceramic and its effect on ballistic  
2 performance. *International Journal of Impact Engineering*. 2005;31(2):113-27.
- 3 32. Zhang T, Ma T, Li W. Preparation of ultrahigh molecular weight polyethylene/WS2  
4 composites for bulletproof materials and study on their bulletproof mechanism. *Journal of*  
5 *Macromolecular Science, Part B*. 2015;54(8):992-1000.
- 6 33. Schaffler MB, Burr DB. Stiffness of compact bone: effects of porosity and density. *Journal*  
7 *of biomechanics*. 1988;21(1):13-6.
- 8 34. Courtney A, Courtney M. A thoracic mechanism of mild traumatic brain injury due to blast  
9 pressure waves. *Medical hypotheses*. 2009;72(1):76-83.
- 10 35. Hoge CW, McGurk D, Thomas JL, Cox AL, Engel CC, Castro CA. Mild traumatic brain  
11 injury in US soldiers returning from Iraq. *New England Journal of Medicine*.  
12 2008;358(5):453-63.
- 13 36. Kaseda S, Tomoike H, Ogata I, Nakamura M. End-systolic pressure-volume, pressure-length,  
14 and stress-strain relations in canine hearts. *American Journal of Physiology-Heart and*  
15 *Circulatory Physiology*. 1985;249(3):H648-H54.
- 16 37. Ruan J, El-Jawahri R, Chai L, Barbat S, Prasad P. Prediction and analysis of human thoracic  
17 impact responses and injuries in cadaver impacts using a full human body finite element  
18 model. *Stapp Car Crash J*. 2003;47:299-321.
- 19 38. Tamura A, Omori K, Miki K, Lee JB, Yang KH, King AI. Mechanical characterization of  
20 porcine abdominal organs. *Stapp Car Crash Journal*. 2002;46(46):55.
- 21 39. Palta E, Fang H, Weggel DC. Finite element analysis of the Advanced Combat Helmet under

- 1 various ballistic impacts. *International Journal of Impact Engineering*. 2018;112:125-43.
- 2 40. Weisenbach CA, Logsdon K, Salzar RS, Chancey VC, Brozoski F. Preliminary investigation  
3 of skull fracture patterns using an impactor representative of helmet back-face deformation.  
4 *Military medicine*. 2018;183:287-93.
- 5 41. Axelsson H, Yelverton JT. Chest wall velocity as a predictor of nonauditory blast injury in a  
6 complex wave environment. *Journal of Trauma and Acute Care Surgery*. 1996;40(3S):31S-  
7 7S.
- 8 42. Aare M, Kleiven S. Evaluation of head response to ballistic helmet impacts using the finite  
9 element method. *International Journal of Impact Engineering*. 2007;34(3):596-608.
- 10 43. Nunes L, Paciornik S, d'Almeida J. Evaluation of the damaged area of glass-fiber-reinforced  
11 epoxy-matrix composite materials submitted to ballistic impacts. *Composites science and*  
12 *technology*. 2004;64(7-8):945-54.

## Figure Captions

Fig. 1. Finite element model including: (a) human torso, (b) bulletproof composite structure, (c) pistol cartridge structure and (d) calculation model.

Fig. 2. Stress-strain curve of EPE.

Fig. 3. The structure of 9 mm FMJ Luger ammo.

bioRxiv preprint doi: <https://doi.org/10.1101/586594>; this version posted March 22, 2019. The copyright holder for this preprint (which was not certified by peer review) is the author/funder, who has granted bioRxiv a license to display the preprint in perpetuity. It is made available under aCC-BY 4.0 International license.

Fig. 4. Comparison of heart pressure obtained by simulation and Roberts.

Fig. 5. Impact process of pistol cartridge on bulletproof composite structure.

Fig. 6. Time histories of (a) velocity of pistol cartridge and (b) total energy of bulletproof composite structure and human torso.

Fig. 7. Distributions of (a) stress and (b) pressure of skin at different time.

Fig. 8. Distributions of (a) stress and (b) pressure of heart at different time.

Fig. 9. Distributions of (a) stress and (b) pressure of lung at different time.

Fig. 10. Distributions of (a) stress and (b) pressure of liver at different time.

Fig. 11. Distributions of (a) stress and (b) pressure of skeleton at different time.

Fig. 12. Time histories of (a) stress, (b) pressure, (c) acceleration and (d) velocity of skeleton.

Fig. 13. Time histories of (a) stress, (b) pressure, (c) acceleration and (d) velocity of internal organs.

Fig. 14. Effects of buffer layer on (a) peak stress, (b) peak pressure, (c) maximum acceleration and (d) maximum velocity of various organs.

bioRxiv preprint doi: <https://doi.org/10.1101/586594>; this version posted March 22, 2019. The copyright holder for this preprint (which was not certified by peer review) is the author/funder, who has granted bioRxiv a license to display the preprint in perpetuity. It is made available under aCC-BY 4.0 International license.

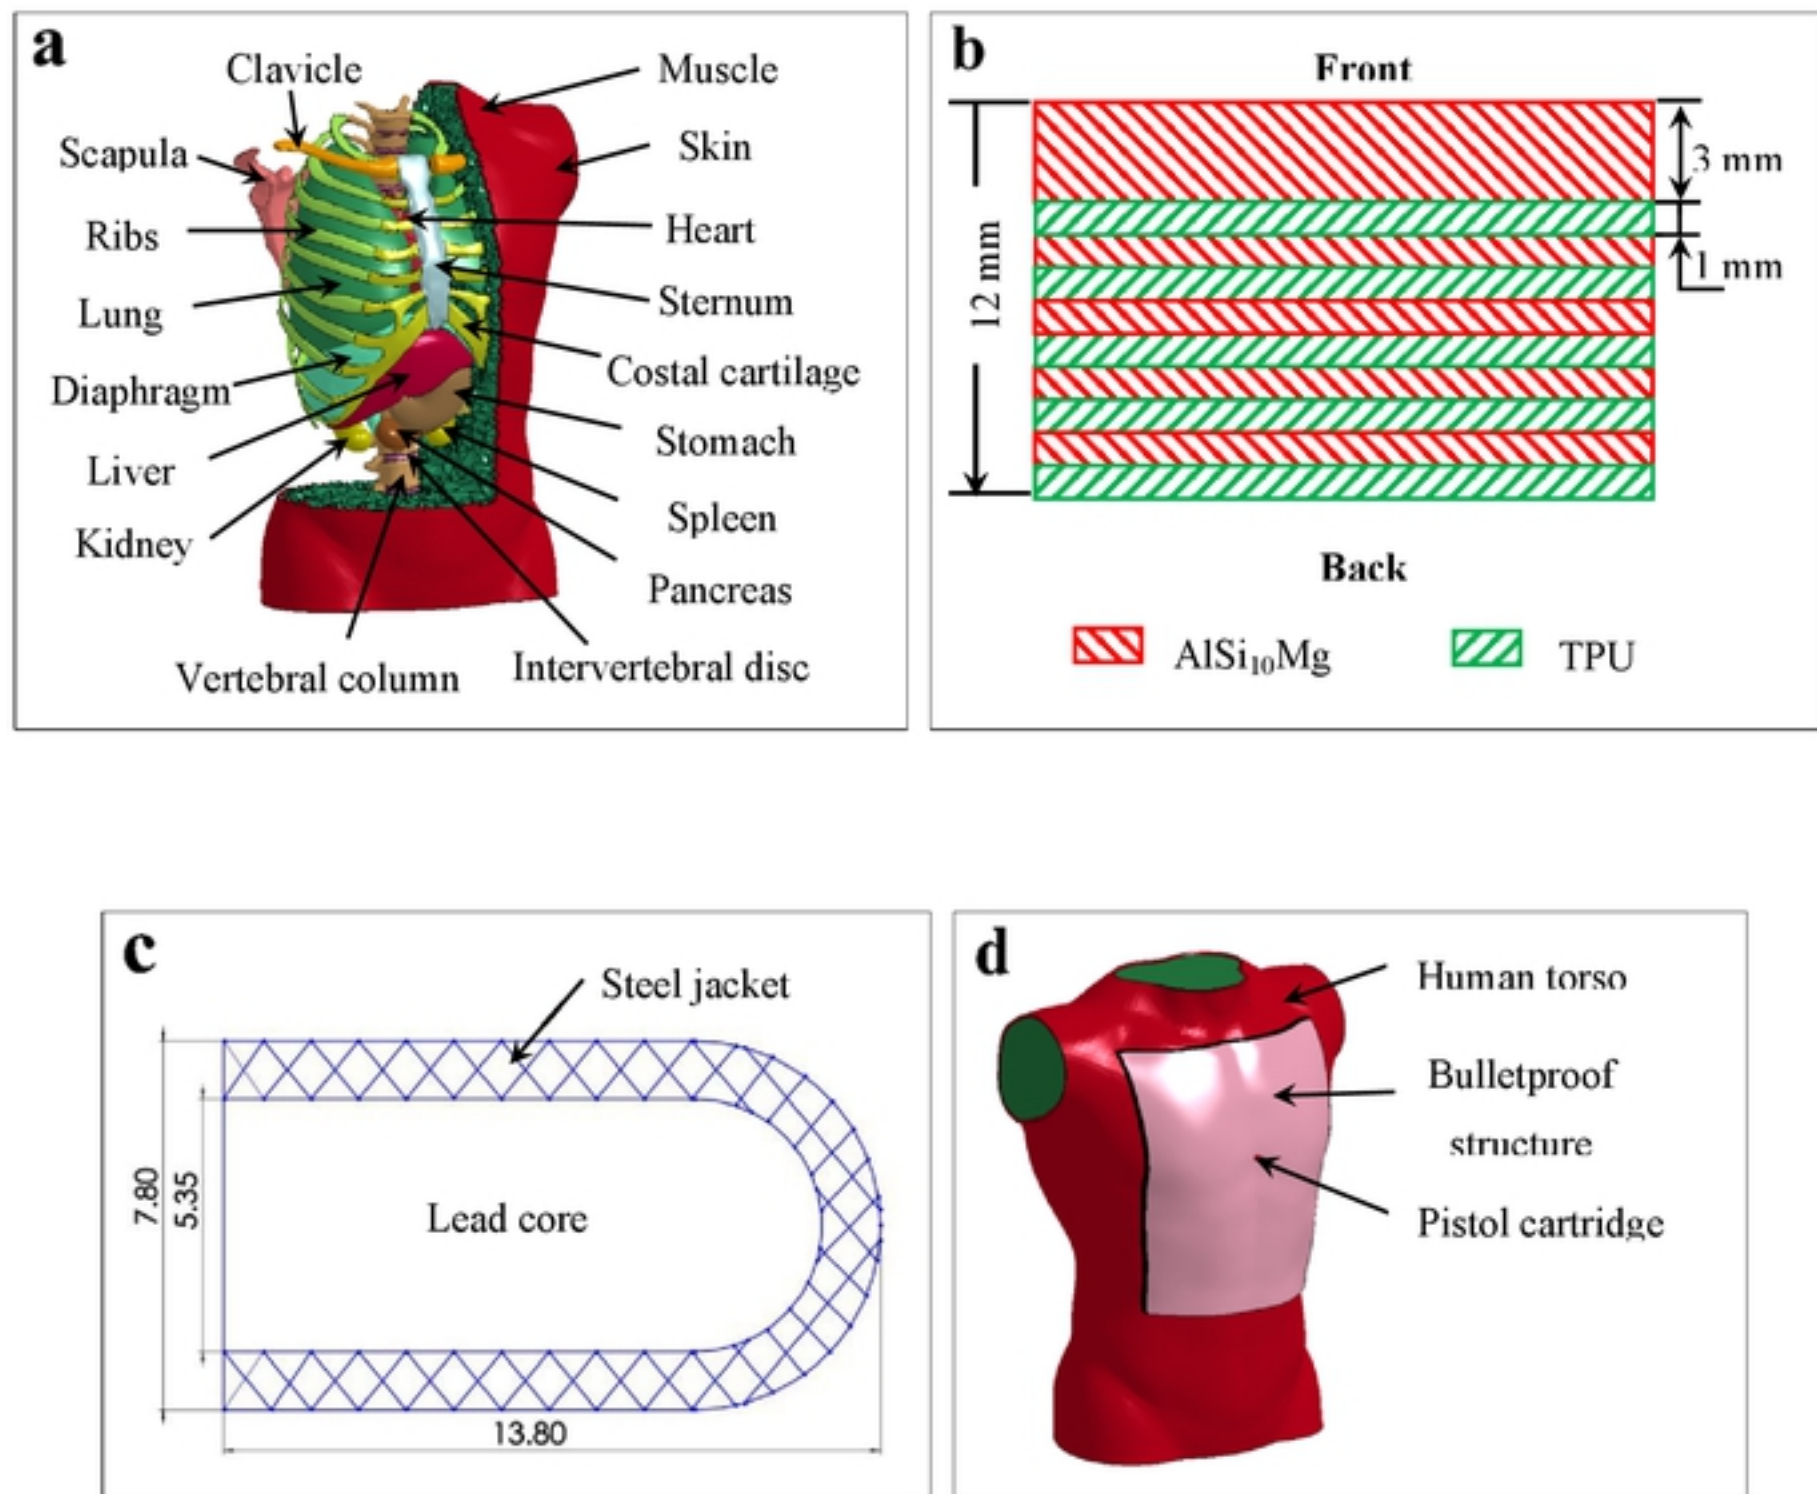

Fig. 1. Finite element model including: (a) human torso, (b) bulletproof composite structure, (c) pistol cartridge

structure and (d) calculation model.

bioRxiv preprint doi: <https://doi.org/10.1101/586594>; this version posted March 22, 2019. The copyright holder for this preprint (which was not certified by peer review) is the author/funder, who has granted bioRxiv a license to display the preprint in perpetuity. It is made available under aCC-BY 4.0 International license.

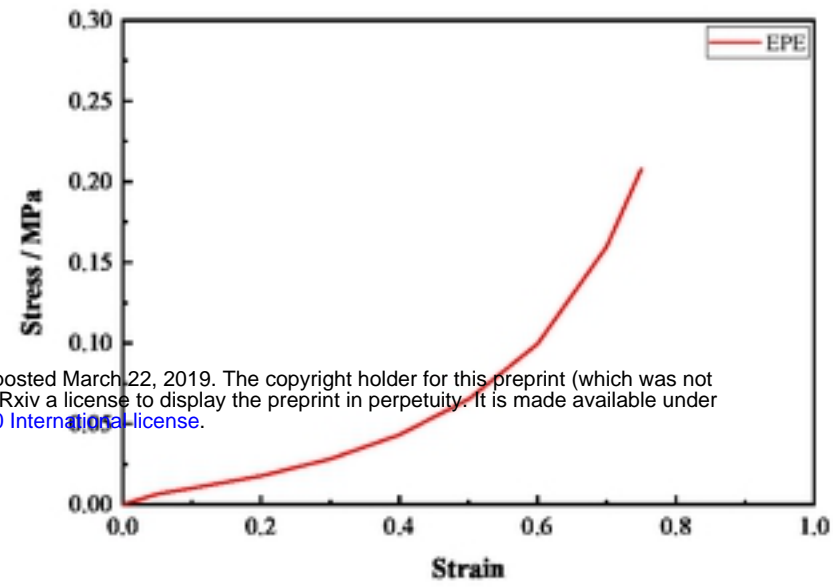

Fig. 2. Stress-strain curve of EPE.

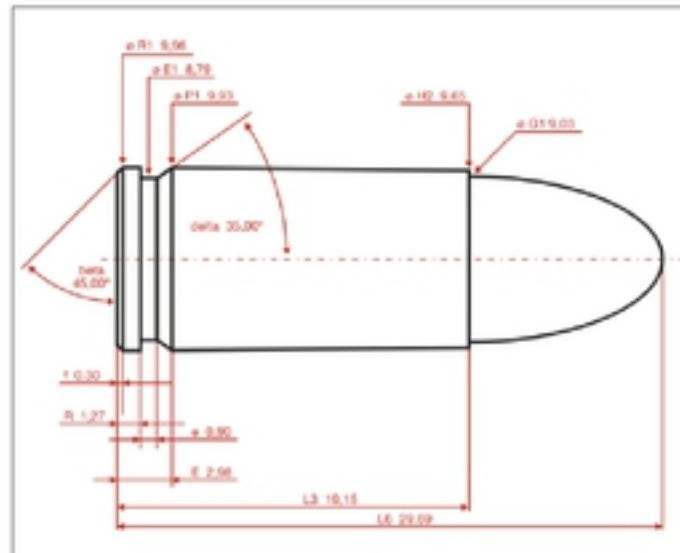

Fig. 3. The structure of 9 mm FMJ Luger ammo.



bioRxiv preprint doi: <https://doi.org/10.1101/586594>; this version posted March 22, 2019. The copyright holder for this preprint (which was not certified by peer review) is the author/funder, who has granted bioRxiv a license to display the preprint in perpetuity. It is made available under aCC-BY 4.0 International license.

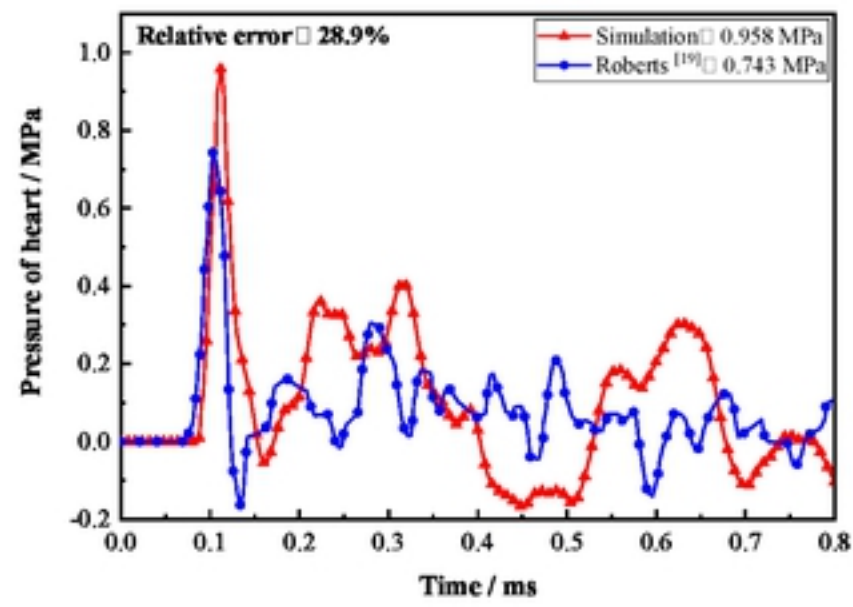

Fig. 4. Comparison of heart pressure obtained by simulation and Roberts.

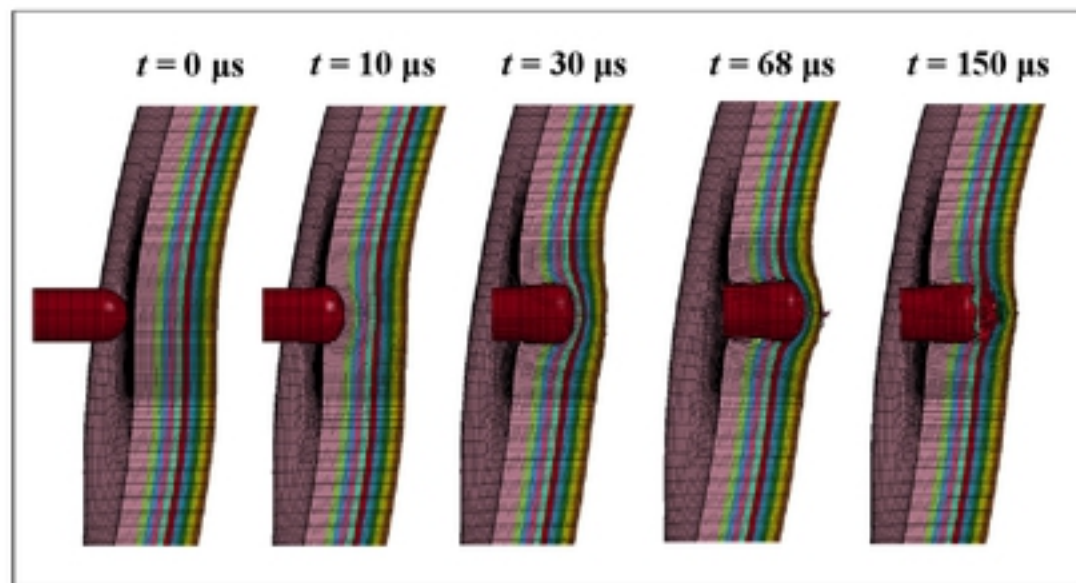

Fig. 5. Impact process of pistol cartridge on bulletproof composite structure.

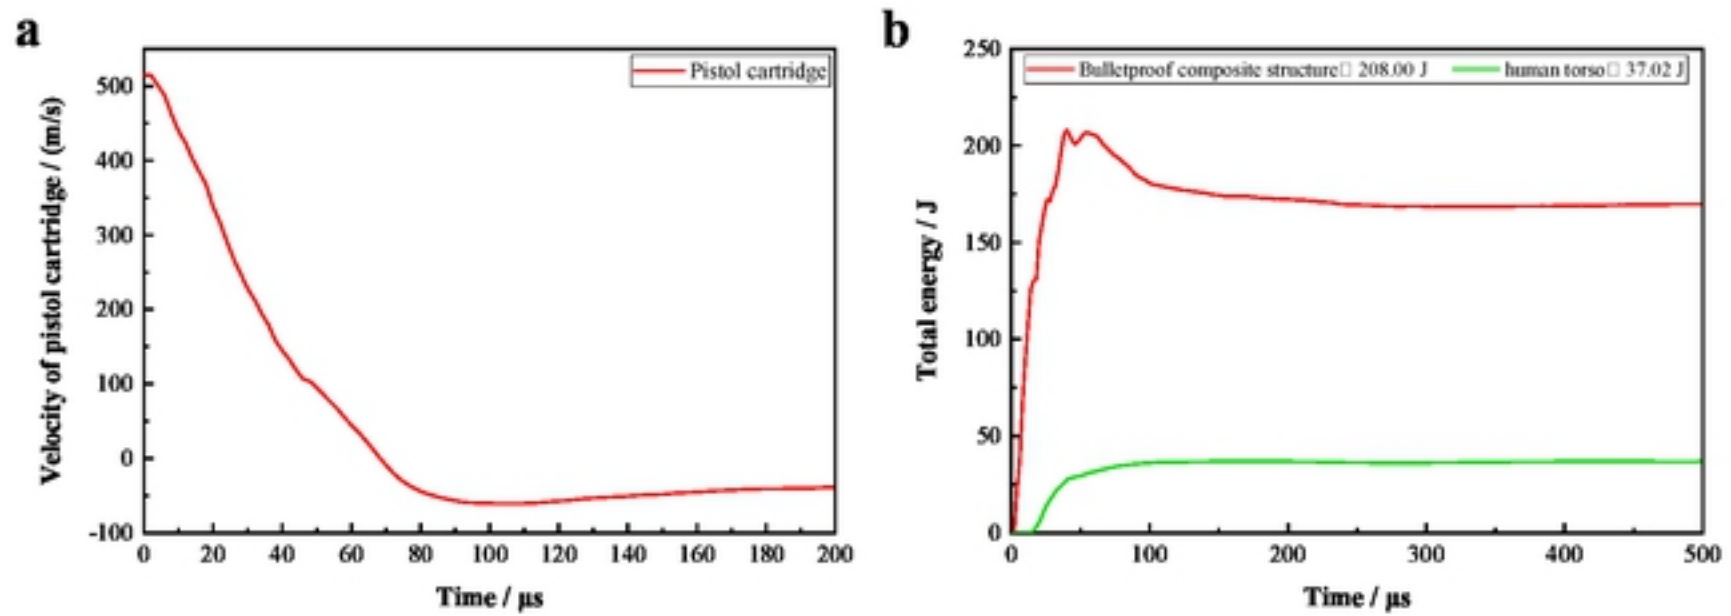

Fig. 6. Time histories of (a) velocity of pistol cartridge and (b) total energy of bulletproof composite structure and human torso.

bioRxiv preprint doi: <https://doi.org/10.1101/086594>; this version posted March 22, 2019. The copyright holder for this preprint (which was not certified by peer review) is the author/funder, who has granted bioRxiv a license to display the preprint in perpetuity. It is made available under aCC-BY 4.0 International license.

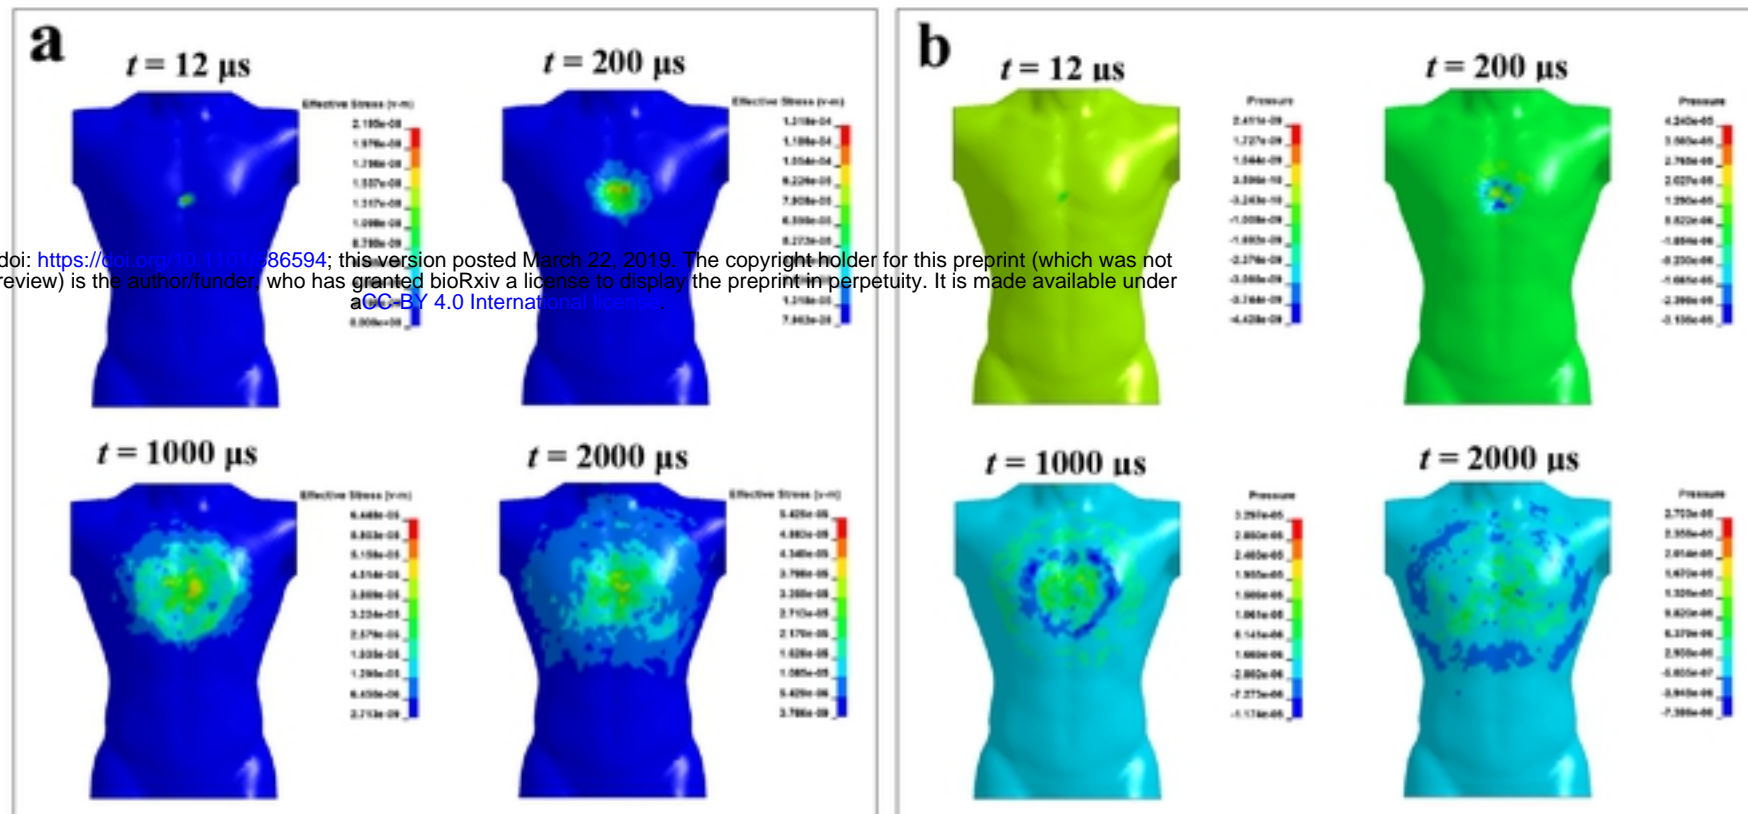

Fig. 7. Distributions of (a) stress and (b) pressure of skin at different time.

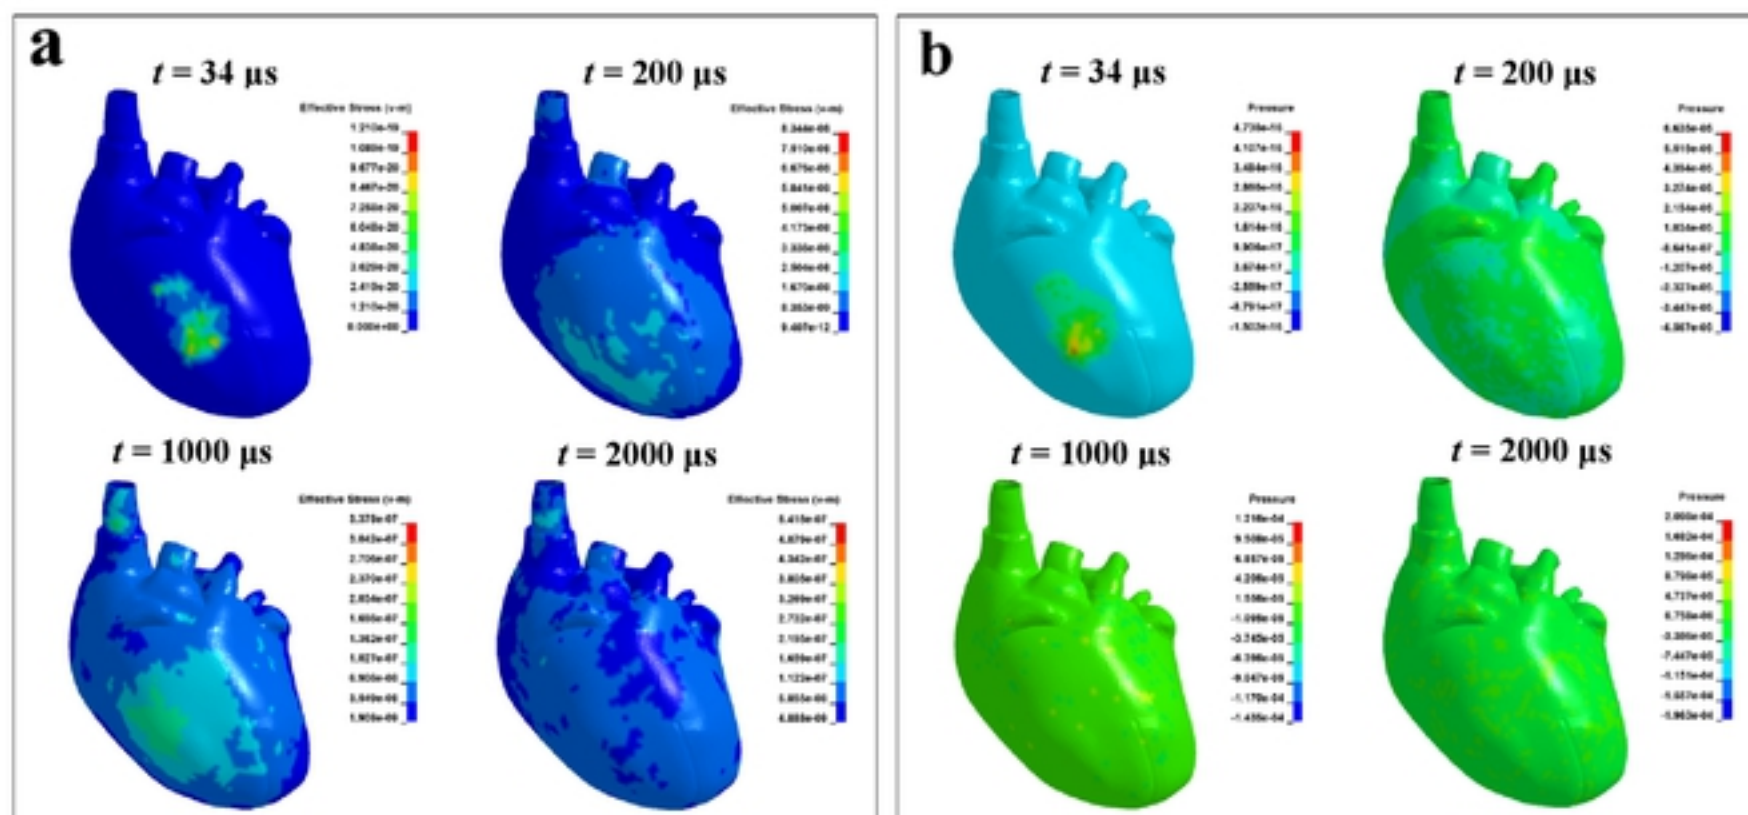

Fig. 8. Distributions of (a) stress and (b) pressure of heart at different time.

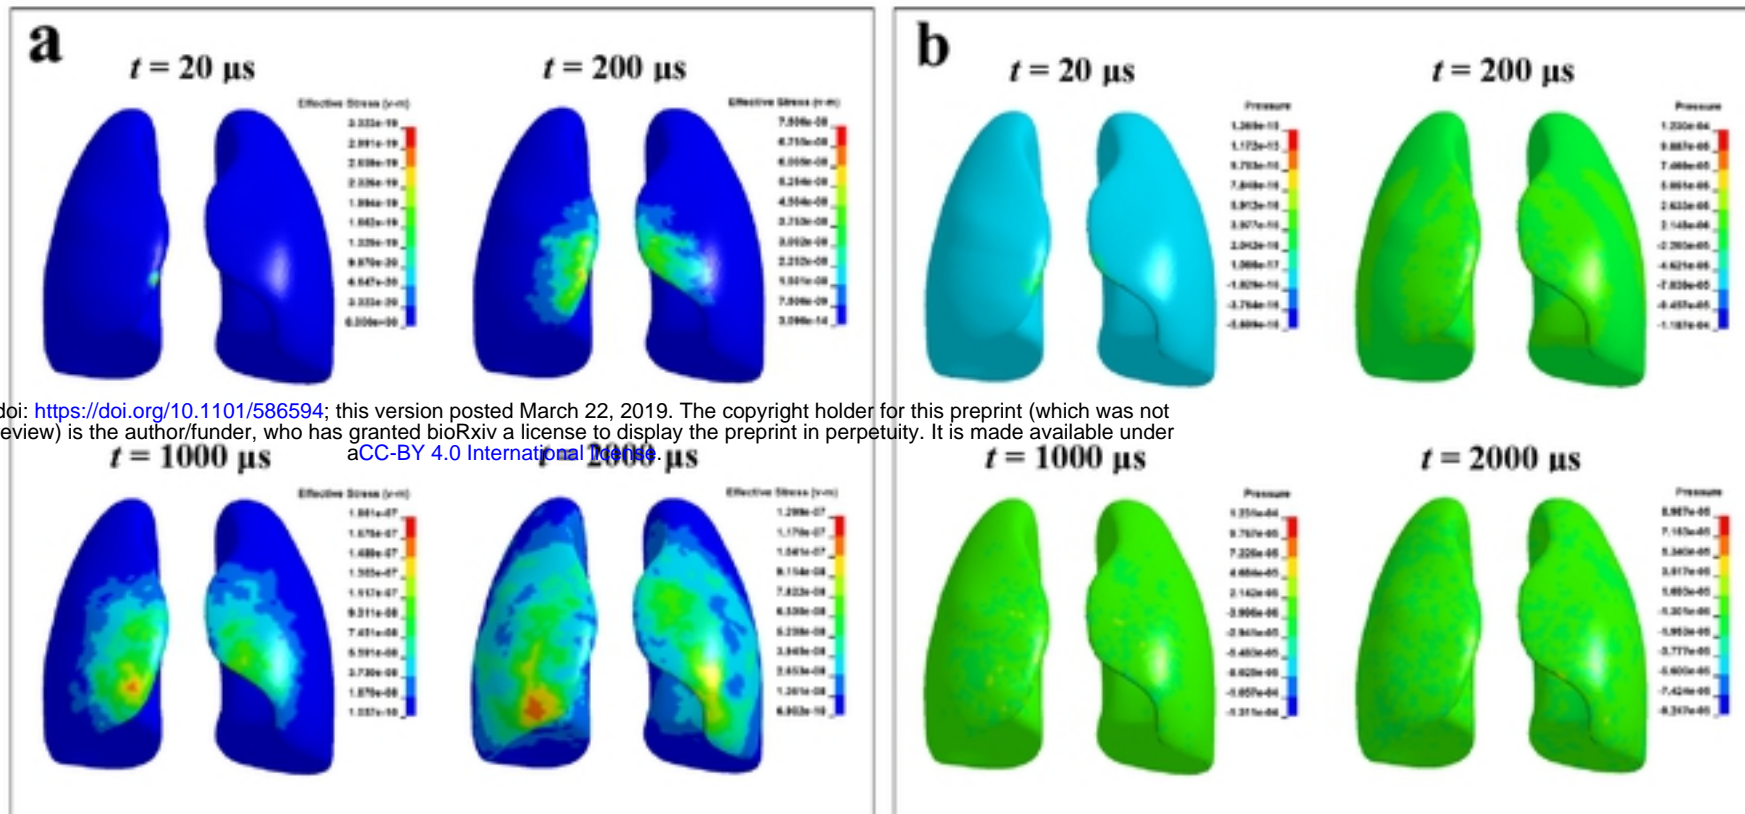

bioRxiv preprint doi: <https://doi.org/10.1101/586594>; this version posted March 22, 2019. The copyright holder for this preprint (which was not certified by peer review) is the author/funder, who has granted bioRxiv a license to display the preprint in perpetuity. It is made available under aCC-BY 4.0 International license.

Fig. 9. Distributions of (a) stress and (b) pressure of lung at different time.

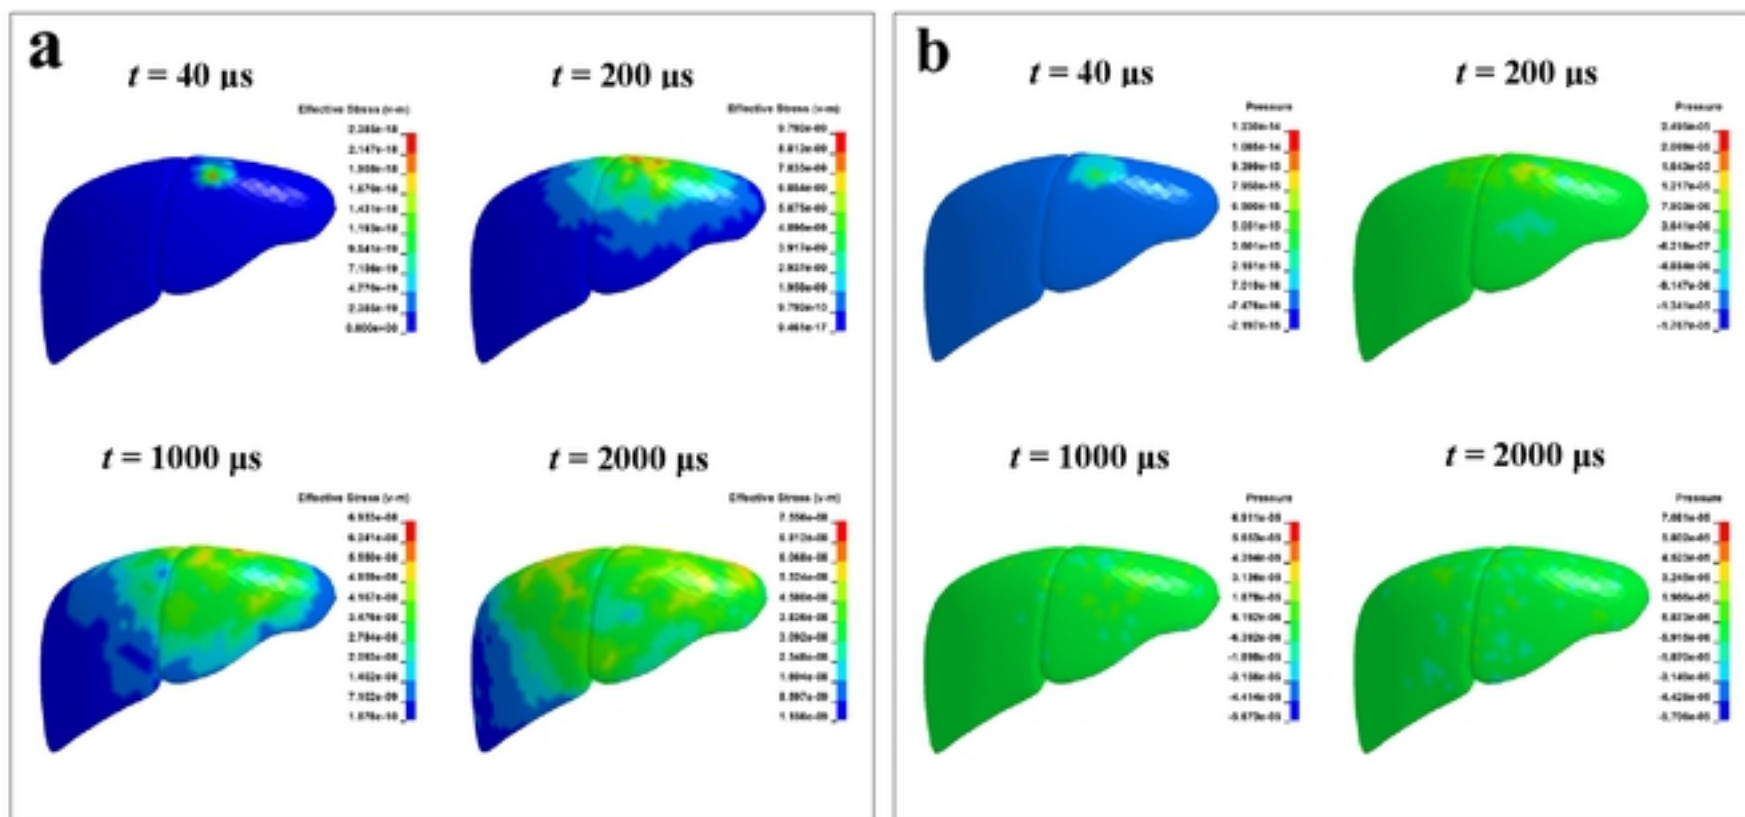

Fig. 10. Distributions of (a) stress and (b) pressure of liver at different time.

bioRxiv preprint doi: <https://doi.org/10.1101/536894>; this version posted March 22, 2019. The copyright holder for this preprint (which was not certified by peer review) is the author/funder, who has granted bioRxiv a license to display the preprint in perpetuity. It is made available under aCC-BY 4.0 International license.

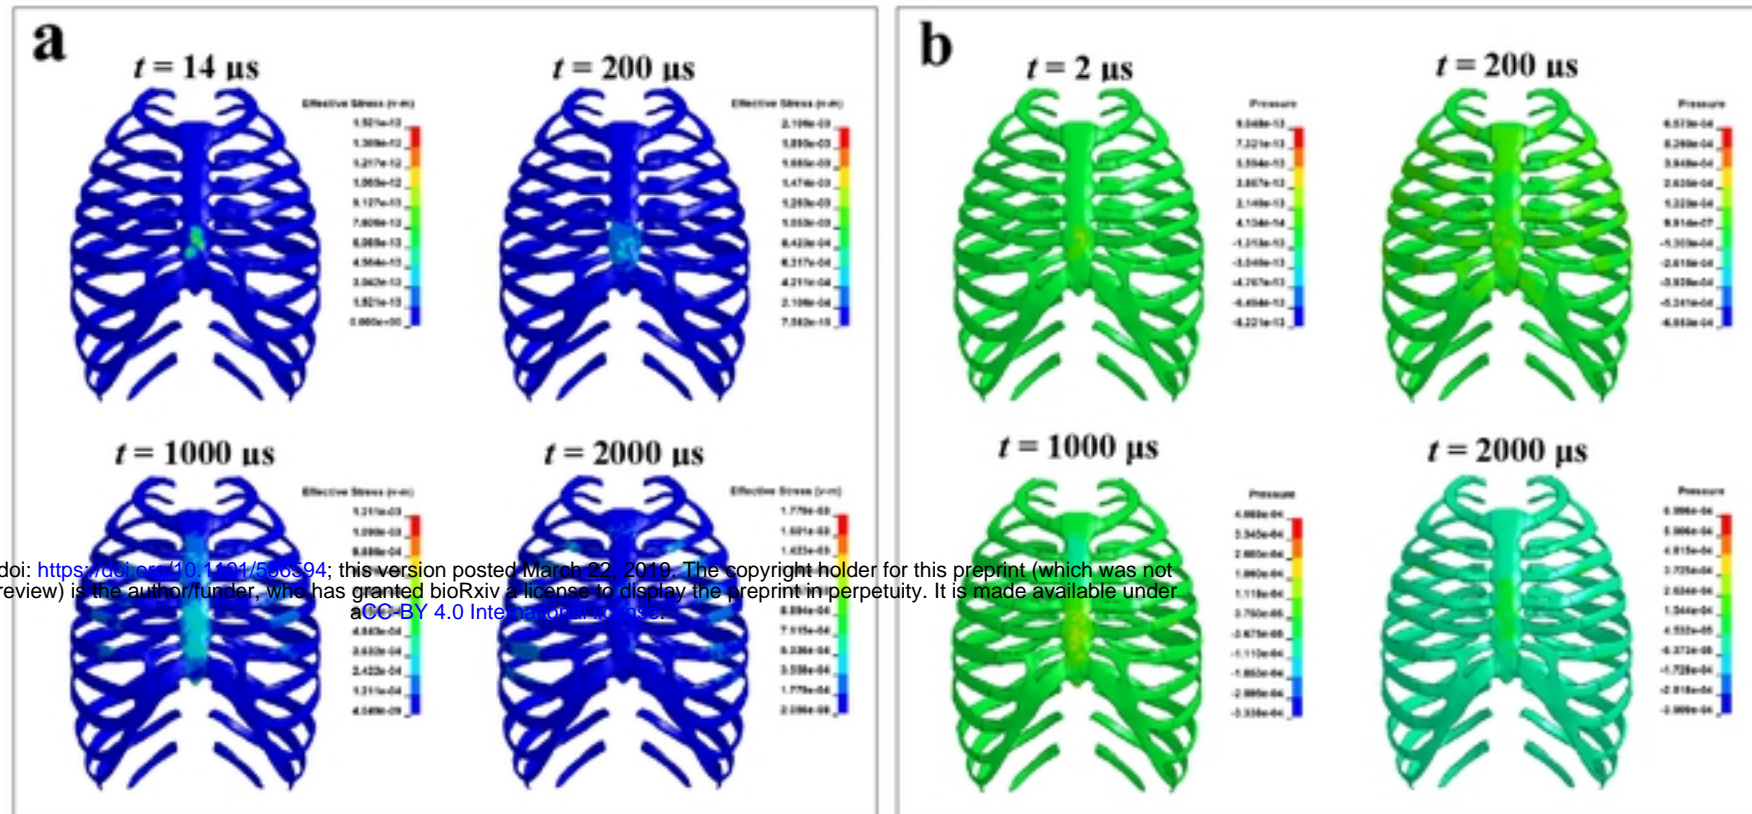

Fig. 11. Distributions of (a) stress and (b) pressure of skeleton at different time.

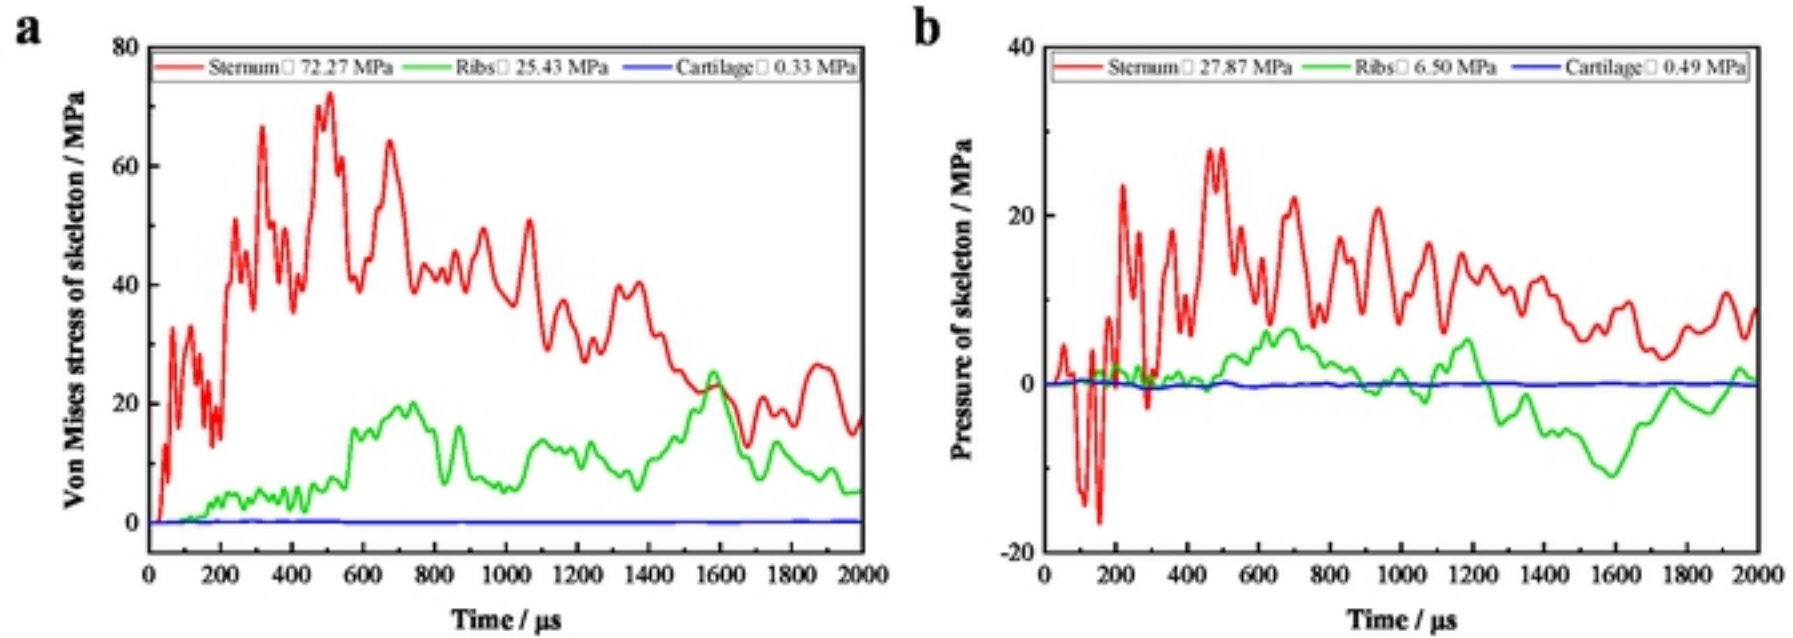

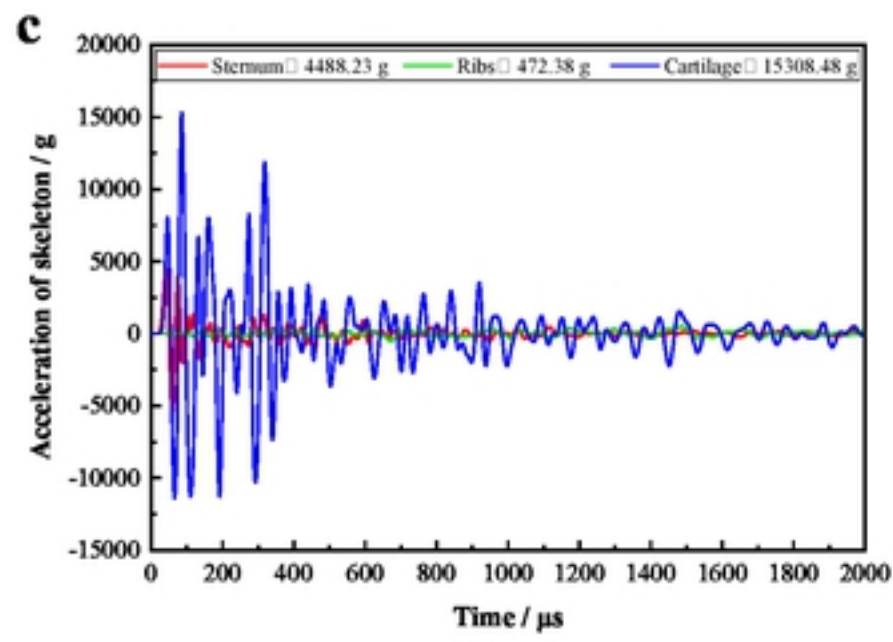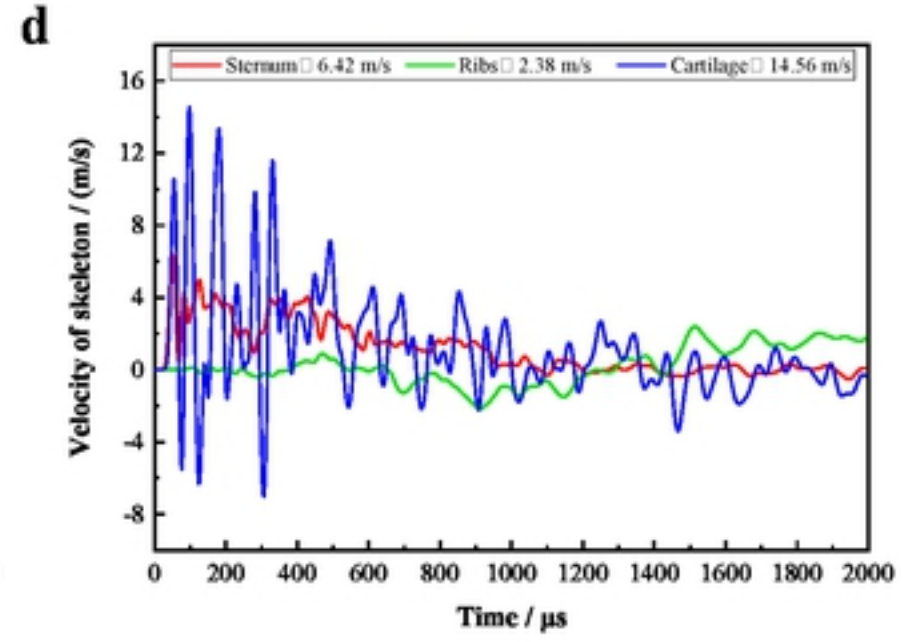

bioRxiv preprint doi: <https://doi.org/10.1101/586594>; this version posted March 22, 2019. The copyright holder for this preprint (which was not certified by peer review) is the author/funder, who has granted bioRxiv a license to display the preprint in perpetuity. It is made available under aCC-BY 4.0 International license.

Fig. 12. Time histories of (a) stress, (b) pressure, (c) acceleration and (d) velocity of skeleton.

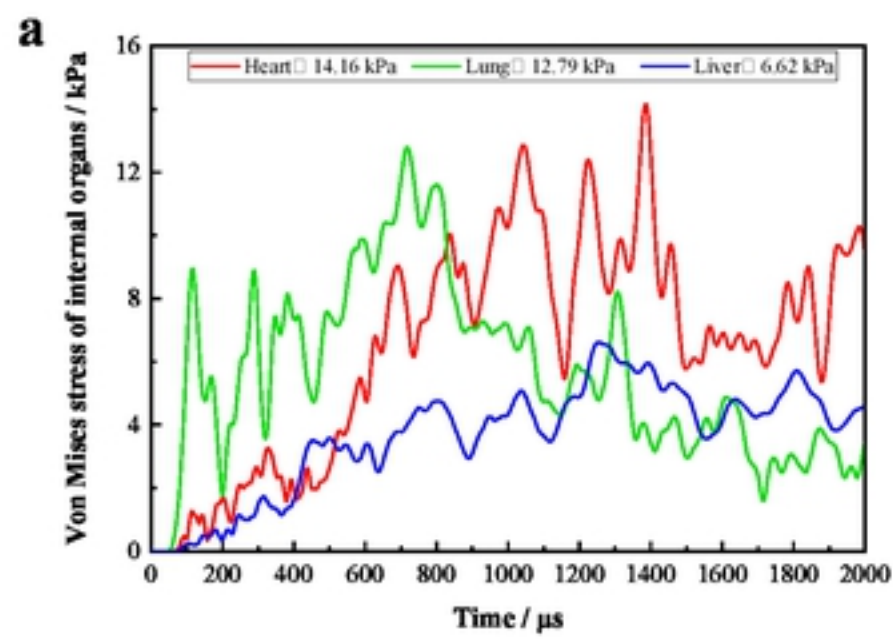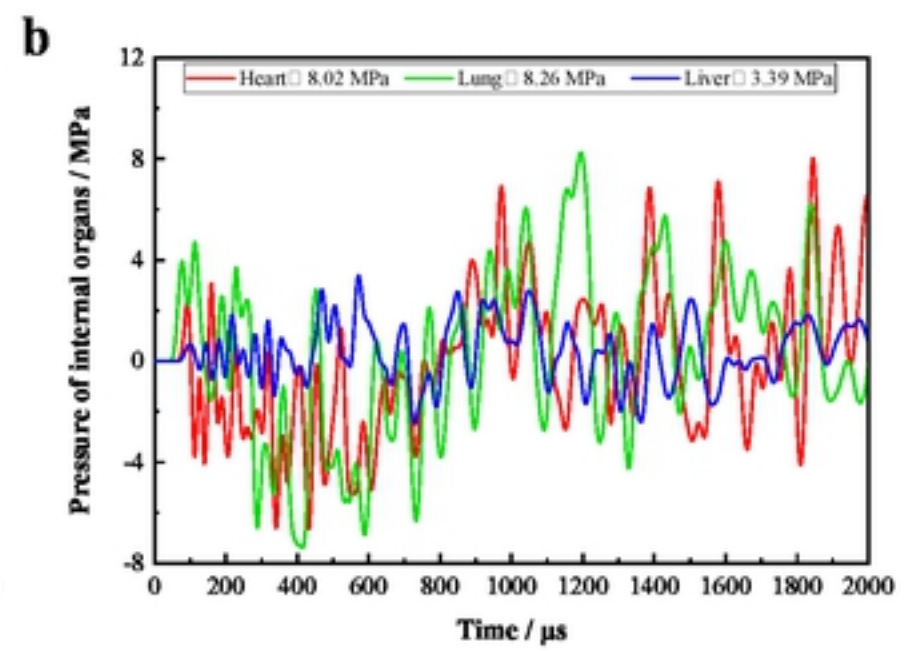

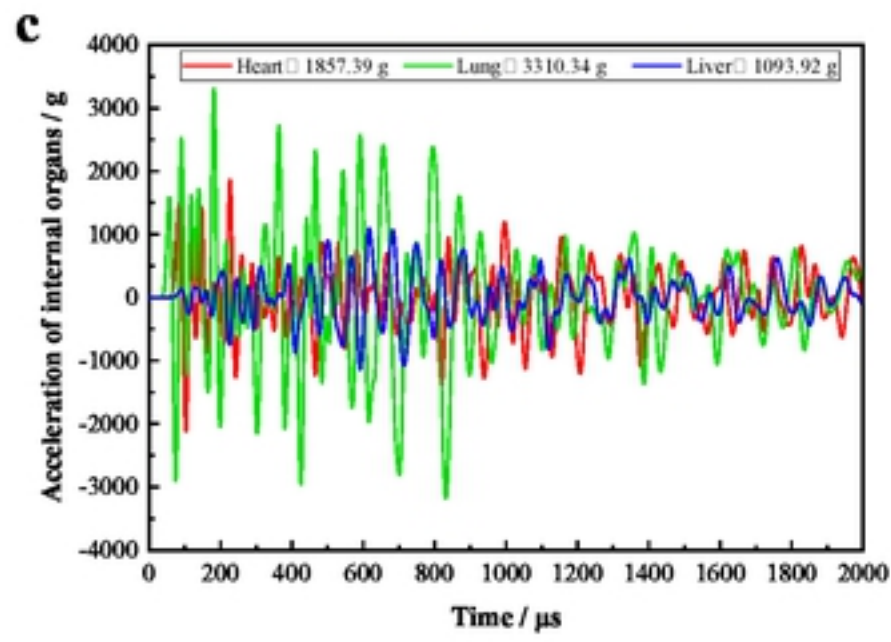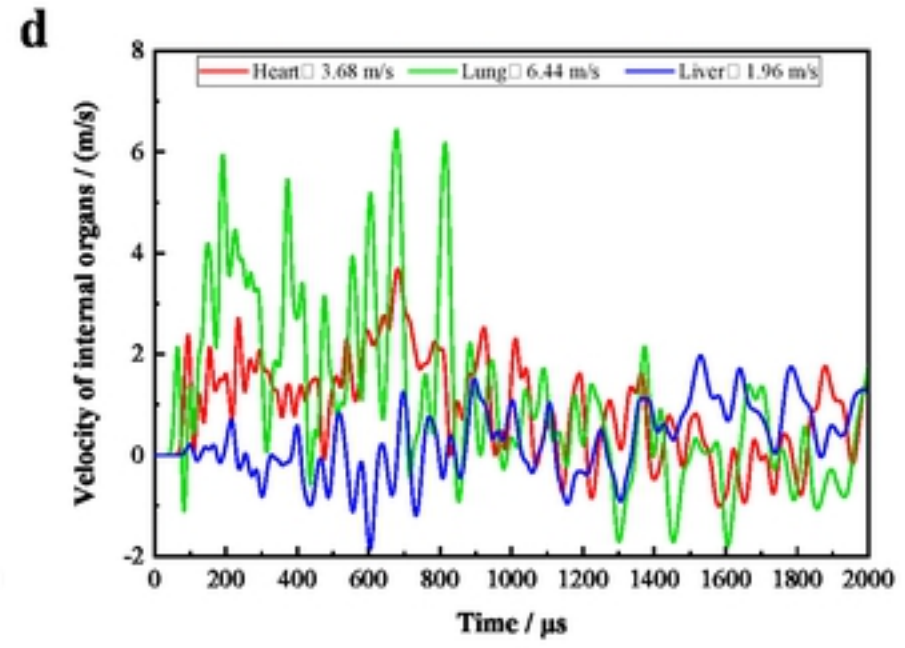

bioRxiv preprint doi: <https://doi.org/10.1101/586594>; this version posted March 22, 2019. The copyright holder for this preprint (which was not certified by peer review) is the author/funder, who has granted bioRxiv a license to display the preprint in perpetuity. It is made available under aCC-BY 4.0 International license.

Fig. 13. Time histories of (a) stress, (b) pressure, (c) acceleration and (d) velocity of internal organs.

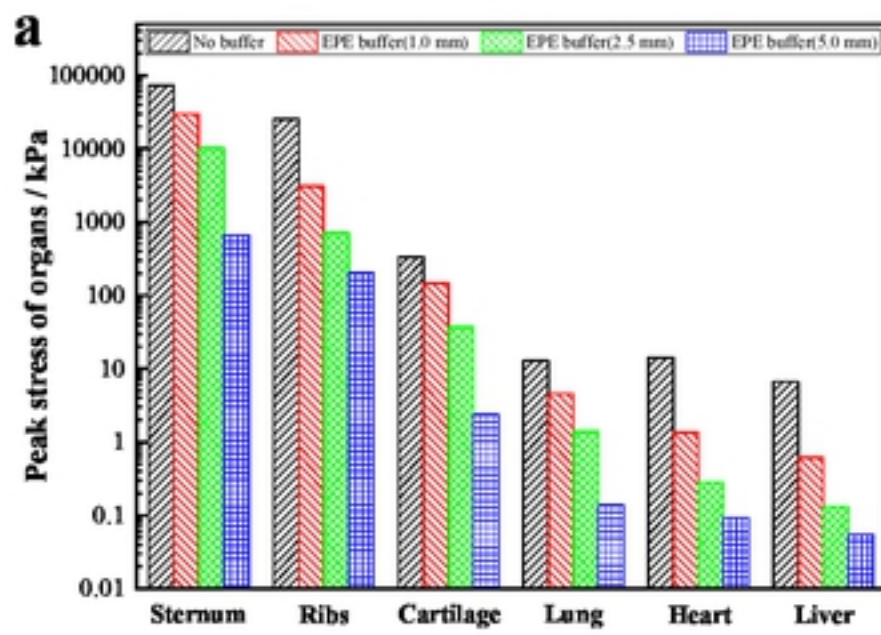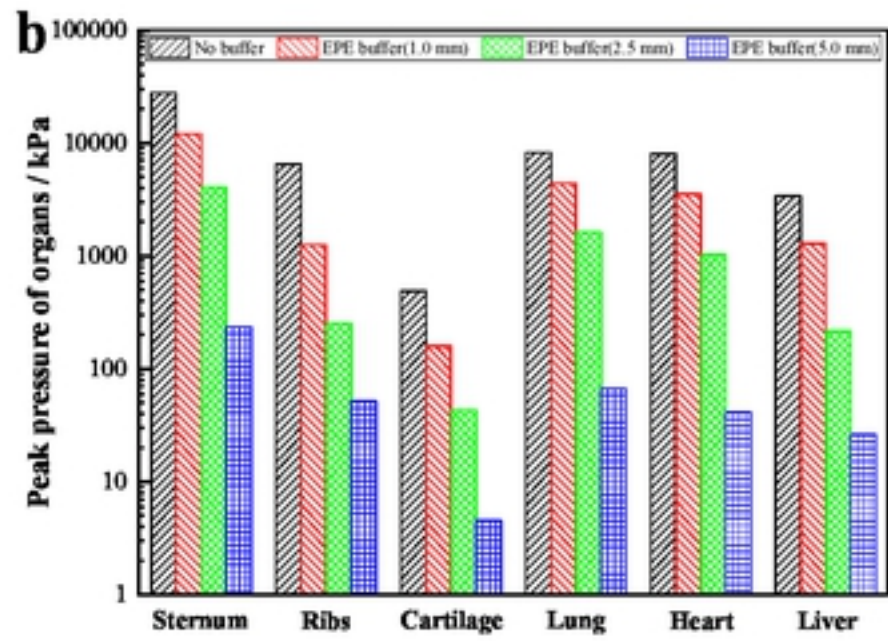

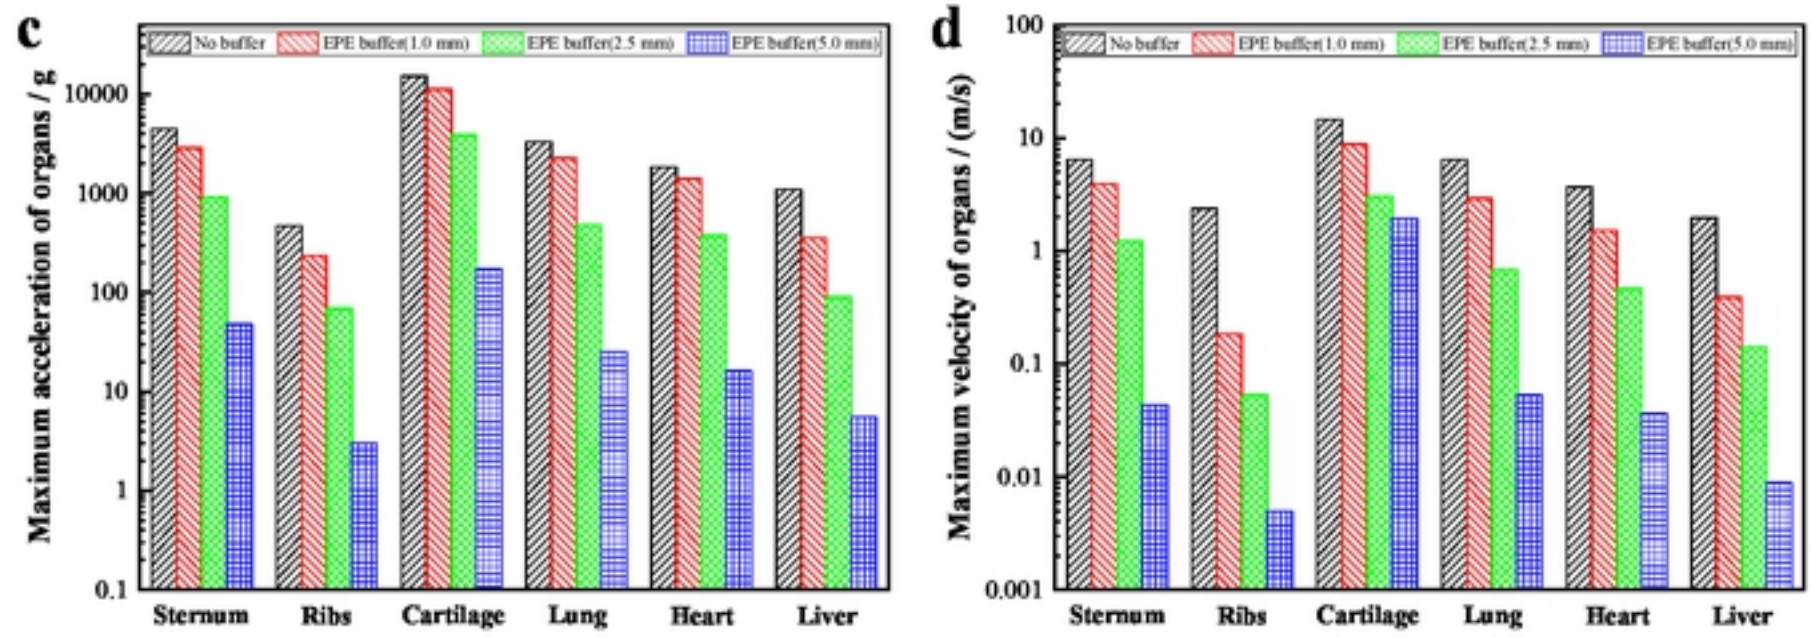

bioRxiv preprint doi: <https://doi.org/10.1101/586594>; this version posted March 22, 2019. The copyright holder for this preprint (which was not certified by peer review) is the author/funder, who has granted bioRxiv a license to display the preprint in perpetuity. It is made available under aCC-BY 4.0 International license.

Fig. 14. Effects of buffer layer on (a) peak stress, (b) peak pressure, (c) maximum acceleration and (d) maximum velocity of various organs.
